# Supplementary material for: Leaf wax n -alkane distributions record ecological changes during the Younger Dryas at Trzechowskie paleolake (northern Poland) without temporal delay
Source: Copernicus journal article supplement (doi:10.5194/cp-14-1607-2018), 2018-11-02
Supplement: Supplementary file 1 [file cp-14-1607-2018-supplement.zip]

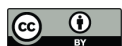

## *Supplement of*

# **Leaf wax $n$ -alkane distributions record ecological changes during the Younger Dryas at Trzechowskie paleolake (northern Poland) without temporal delay**

**Bernhard Aichner et al.**

*Correspondence to:* Bernhard Aichner ([bernhard.aichner@gmx.de](mailto:bernhard.aichner@gmx.de))

- [cp-14-1607-2018-supplement-title-page.pdf](#)
- [AICHNER - fig S1.pdf](#)
- [AICHNER - tables S1 and S2.xlsx](#)
- [AICHNER - tables S3-5.xlsx](#)

The copyright of individual parts of the supplement might differ from the CC BY 4.0 License.
